# Supplementary material for: Is extending eligibility for adult social care better than investing more in existing users in England? A cross-sectional evidence for multiple financial years
Source: HighWire-hosted journal article supplement (doi:10.1136/bmjopen-2022-070833), 2023-09-01
Supplement: bmjopen-2022-070833supp001_data_supplement.pdf [file bmjopen-2022-070833supp001_data_supplement.pdf]

## **Is extending eligibility for Adult Social Care better than investing more in existing users in England?**

Francesco Longo<sup>a,\*</sup> Karl Claxton<sup>a,b</sup> James Lomas<sup>a</sup> Stephen Martin<sup>b</sup>

<sup>a</sup> *Centre for Health Economics, University of York, York, United Kingdom.*

<sup>b</sup> *Department of Economics and Related Studies, University of York, York, United Kingdom.*

\* Correspondence to: Centre for Health economics, University of York, Heslington, York, YO10 5DD, UK. E-mail: francesco.longo@york.ac.uk

## Appendix A

Table A1 – Data sources.

| Variable                                                                                                                                                                        | Original unit   | Unit of analysis | Source of data                                                           | Link                                                                                                                                                                                                                                                                                                                                                                                                            | Date of last access |
|---------------------------------------------------------------------------------------------------------------------------------------------------------------------------------|-----------------|------------------|--------------------------------------------------------------------------|-----------------------------------------------------------------------------------------------------------------------------------------------------------------------------------------------------------------------------------------------------------------------------------------------------------------------------------------------------------------------------------------------------------------|---------------------|
| Care-related quality of life, gender, age, ethnicity, language, type of social care support, help with questionnaire, questionnaire version, private and informal care received | Individual      | Individual       | NHS Digital: Personal Social Services Adult Social Care Survey           | <a href="https://digital.nhs.uk/data-and-information/publications/statistical/personal-social-services-adult-social-care-survey">https://digital.nhs.uk/data-and-information/publications/statistical/personal-social-services-adult-social-care-survey</a>                                                                                                                                                     | 01/02/2022          |
| Activities of daily living in the past two years                                                                                                                                | Individual      | Local authority  |                                                                          |                                                                                                                                                                                                                                                                                                                                                                                                                 |                     |
| Informal unpaid carer characteristics                                                                                                                                           | Individual      | Local authority  | NHS Digital: Personal Social Services Survey of Adult Carers in England  | <a href="https://digital.nhs.uk/data-and-information/publications/statistical/personal-social-services-survey-of-adult-carers">https://digital.nhs.uk/data-and-information/publications/statistical/personal-social-services-survey-of-adult-carers</a>                                                                                                                                                         | 01/02/2022          |
| Public adult social care expenditure, adult social care activity volumes                                                                                                        | Local authority | Local authority  | NHS Digital: Adult Social Care Activity and Finance Report               | <a href="https://digital.nhs.uk/data-and-information/publications/statistical/adult-social-care-activity-and-finance-report">https://digital.nhs.uk/data-and-information/publications/statistical/adult-social-care-activity-and-finance-report</a>                                                                                                                                                             | 01/02/2022          |
| Vision impairment                                                                                                                                                               | Local authority | Local authority  | NHS Digital: Registered Blind and Partially Sighted People               | <a href="https://digital.nhs.uk/data-and-information/publications/statistical/registered-blind-and-partially-sighted-people">https://digital.nhs.uk/data-and-information/publications/statistical/registered-blind-and-partially-sighted-people</a>                                                                                                                                                             | 01/02/2022          |
| Hearing impairment                                                                                                                                                              | Local authority | Local authority  | NHS Digital: People registered as deaf or hard of hearing                | <a href="https://digital.nhs.uk/data-and-information/publications/statistical/people-registered-as-deaf-or-hard-of-hearing/people-registered-as-deaf-or-hard-of-hearing-england-year-ending-31-march-2010">https://digital.nhs.uk/data-and-information/publications/statistical/people-registered-as-deaf-or-hard-of-hearing/people-registered-as-deaf-or-hard-of-hearing-england-year-ending-31-march-2010</a> | 01/02/2022          |
| Dementia                                                                                                                                                                        | Local authority | Local authority  | NHS Digital: Recorded Dementia Diagnoses                                 | <a href="https://digital.nhs.uk/data-and-information/publications/statistical/recorded-dementia-diagnoses">https://digital.nhs.uk/data-and-information/publications/statistical/recorded-dementia-diagnoses</a>                                                                                                                                                                                                 | 01/02/2022          |
| Population characteristics across local authorities                                                                                                                             | LSOA            | Local authority  | 2011 Census                                                              | <a href="https://census.ukdataservice.ac.uk/get-data/aggregate-data">https://census.ukdataservice.ac.uk/get-data/aggregate-data</a>                                                                                                                                                                                                                                                                             | 01/02/2022          |
| Income deprivation, disability deprivation, education deprivation                                                                                                               | LSOA            | Local authority  | Ministry of Housing, Communities & Local Government website              | <a href="https://opendatacommunities.org/resource?uri=http%3A%2F%2Fopendatacommunities.org%2Fdef%2Fconcept%2Ffolders%2Forrganisations%2Fdepartment-for-communities-and-local-government">https://opendatacommunities.org/resource?uri=http%3A%2F%2Fopendatacommunities.org%2Fdef%2Fconcept%2Ffolders%2Forrganisations%2Fdepartment-for-communities-and-local-government</a>                                     | 01/02/2022          |
| Council tax base                                                                                                                                                                | Local authority | Local authority  | Government website: council taxbase statistics                           | <a href="https://www.gov.uk/government/collections/council-taxbase-statistics">https://www.gov.uk/government/collections/council-taxbase-statistics</a>                                                                                                                                                                                                                                                         | 26/02/2021          |
| Business rate tax base                                                                                                                                                          | Local authority | Local authority  | Government website: non-domestic rating - stock of properties collection | <a href="https://www.gov.uk/government/collections/non-domestic-rating-stock-of-properties-collection">https://www.gov.uk/government/collections/non-domestic-rating-stock-of-properties-collection</a>                                                                                                                                                                                                         | 26/02/2021          |
| Area cost adjustment index                                                                                                                                                      | Local authority | Local authority  | National archive                                                         | <a href="https://webarchive.nationalarchives.gov.uk/20140505105851/http://www.local.communities.gov.uk/finance/1314/CalcFFs.pdf">https://webarchive.nationalarchives.gov.uk/20140505105851/http://www.local.communities.gov.uk/finance/1314/CalcFFs.pdf</a>                                                                                                                                                     | 26/02/2021          |

Table A2 – Key first-stage results in all financial years.

| Instrument                                      | 2017/18                                       |                                               |                                                       |                              | 2018/19                                       |                                               |                                                       |                              | 2019/20                                       |                                               |                                                       |                              |
|-------------------------------------------------|-----------------------------------------------|-----------------------------------------------|-------------------------------------------------------|------------------------------|-----------------------------------------------|-----------------------------------------------|-------------------------------------------------------|------------------------------|-----------------------------------------------|-----------------------------------------------|-------------------------------------------------------|------------------------------|
|                                                 | Longo et al. (2021)                           |                                               | New model (2)                                         |                              | Longo et al. (2021)                           |                                               | New model (2)                                         |                              | Longo et al. (2021)                           |                                               | New model (2)                                         |                              |
|                                                 | Public adult social care expenditure per user | Public adult social care expenditure per user | Public adult social care expenditure per user squared | Proportion of eligible users | Public adult social care expenditure per user | Public adult social care expenditure per user | Public adult social care expenditure per user squared | Proportion of eligible users | Public adult social care expenditure per user | Public adult social care expenditure per user | Public adult social care expenditure per user squared | Proportion of eligible users |
| Council tax base per user                       | 0.718***                                      | 1.459***                                      | -13.646***                                            | -0.204***                    | 0.730***                                      | 1.319***                                      | -10.155***                                            | -0.171***                    | 0.624***                                      | 1.344***                                      | -10.926***                                            | -0.159***                    |
| Council tax base per user squared               |                                               | -0.014***                                     | 0.234***                                              | 0.002***                     |                                               | -0.011***                                     | 0.179***                                              | 0.002***                     |                                               | -0.012***                                     | 0.191***                                              | 0.002***                     |
| County                                          |                                               | 1.312                                         | -26.963***                                            | -0.034                       |                                               | 0.814                                         | -21.042***                                            | -0.033                       |                                               | 1.651***                                      | -1.418                                                | -0.013                       |
| Metropolitan district                           |                                               | 0.798                                         | -5.722                                                | -0.145***                    |                                               | 0.754                                         | -4.450                                                | -0.164***                    |                                               | 2.504***                                      | 12.826***                                             | -0.140***                    |
| Unitary authority                               |                                               | 2.486***                                      | -16.491*                                              | -0.044                       |                                               | 2.245***                                      | -5.990                                                | -0.026                       |                                               | 3.303***                                      | 9.701**                                               | -0.006                       |
| Observations                                    | 52,602                                        | 52,602                                        | 52,602                                                | 52,602                       | 55,570                                        | 55,570                                        | 55,570                                                | 55,570                       | 50,441                                        | 50,441                                        | 50,441                                                | 50,441                       |
| First-stage Kleibergen-Paap rk Wald F statistic | 434.3                                         |                                               | 15.8                                                  |                              | 398.6                                         |                                               | 10.9                                                  |                              | 408.9                                         |                                               | 7.4                                                   |                              |
| First-stage Sanderson-Windmeijer F statistic    | 434.3                                         | 26.4                                          | 31.7                                                  | 27.1                         | 398.6                                         | 18.8                                          | 22.7                                                  | 18.6                         | 408.9                                         | 13.6                                          | 11.1                                                  | 13.1                         |

Longo et al. (2021)=regression (1) as proposed by Longo et al. (2021), New model (2)=regression (2) in this study.  
The results on control variables are not reported. All regressions are weighted using the survey weight. Standard errors are clustered within LAs and strata.  
\*\*\* = p-value<0.01, \*\* = p-value<0.05, \* = p-value<0.10

## Appendix B

### B1. Unobserved eligibility level as a source of bias

Longo, et al.<sup>1</sup> discusses the potential sources of bias for the estimated marginal effect of ASC expenditure per user on CRQoL. One of these potential sources is, if unobserved, the level of eligible users across LAs. This is because the higher the eligibility levels, the more users receive ASC and, therefore, for a given budget, the lower the public ASC expenditure or intensity of care for each user. In addition, higher eligibility levels reduce users' uncertainty on future care costs and, therefore, are expected to have a positive impact on users' CRQoL. If unobserved, the effect of a marginal increase in public ASC expenditure on CRQoL will capture the beneficial effect on CRQoL of greater intensity of care and the detrimental effect on CRQoL of lower eligibility levels. Hence, unobserved variability in eligibility levels is likely to bias the marginal effect of ASC expenditure per user on CRQoL downwardly.

## Appendix C

### C1. Selection of the control variables in the new model

The new regression (2) proposed in this study includes a subset of the control variables in regression (1), which replicates the study by Longo, et al.<sup>1</sup> Table C1 provides the list of the control variables used in the two analyses. Longo, et al.<sup>1</sup> includes several user-level and LA-level control variables. This is because the exogeneity argument on the instrument, the council tax base per user, is valid conditionally on the socio-economic status of the LAs. Therefore, the inclusion of several control variables aims to fully capture the socio-economic status of each LA.

Regression (2) requires the same assumption of conditional exogeneity of the instruments used by Longo, et al.<sup>1</sup> to produce an unbiased estimate of the effect of ASC expenditure per user. However, in addition to ASC expenditure per user, it includes two further endogenous variables: ASC expenditure per user squared and the proportion of eligible users. These three endogenous variables are expected to be highly correlated. This high correlation is likely to inflate the estimated variance of the parameters of interest, i.e. the parameters on ASC expenditure per user and its square, making the estimates less precise. This is called the issue of multicollinearity.<sup>2, p. 83</sup> To measure the magnitude of the potential multicollinearity we use the variance inflation factor (VIF). The VIF indicates the extent an explanatory variable can be explained by the other explanatory variables in the model. For example, if the VIF of a variable is greater than 10 then the R-squared from regressing that variable on the other covariates is greater than 90%. The bottom of Table C2 shows that, in the model proposed by Longo, et al.<sup>1</sup>, the VIF on ASC expenditure per user is relatively low varying between 5.3 in 2017/18 and 9.1 in 2019/20. If the same control variables used by Longo, et al.<sup>1</sup> are included in regression (2), however, the multicollinearity issue becomes more substantial as the VIF on ASC expenditure per user is well above 70 in all financial years. A substantially higher VIF implies that the variance of the key estimated parameters of interest are inflated and, therefore, their interpretation becomes unclear.

To reduce this issue, we restrict the set of control variables used by Longo, et al.<sup>1</sup> to the subset indicated in Table C1. We argue that this subset of control variables accounts for socio-economic characteristics across LAs such that the required assumption of conditional exogeneity on the instruments still holds true. This is because we include all user-level variables as well as all the LA-level variables used to distribute central funding across LAs, as these are expected to properly reflect need and socio-economic status.<sup>1</sup> In addition, we retain most of the variables capturing carer characteristics. As shown in the bottom of Table C2, this variable selection leads to a substantial reduction of the VIF on ASC expenditure per user in the new regression (2). The VIF now varies between 18.4 in 2017/18 and 26.4 in 2019/20. Finally, in line with our assumption, the over-identification test suggests that the instruments are still likely to be exogenous conditional on the

---

<sup>1</sup> The central government distributes grants across LAs using the ASC relative needs formula. This formula includes a constant amount per capita across LAs and top-ups to account for needs through age, socio-economic deprivation, and rurality. It adjusts also for labour costs.

chosen subset of control variables.

Table C1 – Selection of the control variables.

|             | Control variable                                                         | Level | Longo et al. (2021) | New model (2) |
|-------------|--------------------------------------------------------------------------|-------|---------------------|---------------|
| Eligibility | Outer London borough                                                     | LA    | Yes                 | No            |
|             | County                                                                   | LA    | Yes                 | No            |
|             | Metropolitan district                                                    | LA    | Yes                 | No            |
|             | Unitary authority                                                        | LA    | Yes                 | No            |
|             | Proportion of eligible users                                             | LA    | No                  | Yes           |
| user needs  | Female user                                                              | Ind   | Yes                 | Yes           |
|             | User aged 65 or older                                                    | Ind   | Yes                 | Yes           |
|             | User of non-white ethnicity                                              | Ind   | Yes                 | Yes           |
|             | User who did not state ethnicity                                         | Ind   | Yes                 | Yes           |
|             | User whose questionnaire was in non-English European languages           | Ind   | Yes                 | Yes           |
|             | User whose questionnaire was in South Asian languages                    | Ind   | Yes                 | Yes           |
|             | User whose questionnaire was in Middle Eastern languages                 | Ind   | Yes                 | Yes           |
|             | User who received sensory support                                        | Ind   | Yes                 | Yes           |
|             | User who received support with memory and cognition                      | Ind   | Yes                 | Yes           |
|             | User who received learning disability support                            | Ind   | Yes                 | Yes           |
|             | User who received mental health support                                  | Ind   | Yes                 | Yes           |
|             | User who received social support                                         | Ind   | Yes                 | Yes           |
|             | User who did not receive help with questionnaire                         | Ind   | Yes                 | Yes           |
|             | User whose questionnaire was read by someone else                        | Ind   | Yes                 | Yes           |
|             | User whose questionnaire was translated by someone else                  | Ind   | Yes                 | Yes           |
|             | User whose questionnaire was only filled in by someone else              | Ind   | Yes                 | Yes           |
|             | User whose questionnaire was talked through with someone else            | Ind   | Yes                 | Yes           |
|             | User whose questionnaire was answered without asking by someone else     | Ind   | Yes                 | Yes           |
|             | User who received an easy-read questionnaire                             | Ind   | Yes                 | Yes           |
|             | Users who cannot manage personal hygiene by themselves in past year      | LA    | Yes                 | No            |
|             | Users who cannot manage continence by themselves in past year            | LA    | Yes                 | No            |
|             | Users who cannot dress by themselves in past year                        | LA    | Yes                 | No            |
|             | Users who cannot feed by themselves in past year                         | LA    | Yes                 | No            |
|             | Users who cannot ambulate by themselves in past year                     | LA    | Yes                 | No            |
|             | Users who cannot manage personal hygiene by themselves in past two years | LA    | Yes                 | No            |
|             | Users who cannot manage continence by themselves in past two years       | LA    | Yes                 | No            |
|             | Users who cannot dress by themselves in past two years                   | LA    | Yes                 | No            |
|             | Users who cannot feed by themselves in past two years                    | LA    | Yes                 | No            |
|             | Users who cannot ambulate by themselves in past two years                | LA    | Yes                 | No            |
|             | People who are sight impaired                                            | LA    | Yes                 | No            |
|             | People who are hearing impaired 2010                                     | LA    | Yes                 | No            |
|             | People who are sight and hearing impaired                                | LA    | Yes                 | No            |
|             | People aged 65 or older with dementia                                    | LA    | Yes                 | No            |
|             | People whose disability limits daily activities a little                 | LA    | Yes                 | No            |
|             | People whose disability limits daily activities a lot                    | LA    | Yes                 | No            |
|             | Disability deprivation: quartile 2                                       | LA    | Yes                 | No            |
|             | Disability deprivation: quartile 3                                       | LA    | Yes                 | No            |
|             | Disability deprivation: quartile 4 (most deprived)                       | LA    | Yes                 | No            |
|             | People aged 18-64 claiming Disability Living Allowance                   | LA    | Yes                 | Yes           |
|             | People aged 65 or older claiming Attendance Allowance                    | LA    | Yes                 | Yes           |
|             | Single-person households aged 0-64                                       | LA    | Yes                 | Yes           |
|             | Single-person households aged 65 or older                                | LA    | Yes                 | Yes           |
|             | People in household with 0.5 to 1.0 persons per bedroom                  | LA    | Yes                 | No            |
|             | People in household with 1.0 to 1.5 persons per bedroom                  | LA    | Yes                 | No            |
|             | People in household with over 1.5 persons per bedroom                    | LA    | Yes                 | No            |
|             | People who are house owners                                              | LA    | Yes                 | Yes           |
|             | Population density per 10,000 people                                     | LA    | Yes                 | Yes           |
|             | People who are in routine occupation                                     | LA    | Yes                 | Yes           |
|             | People who never worked and are long-term unemployed                     | LA    | Yes                 | Yes           |
|             | Education deprivation: quartile 2                                        | LA    | Yes                 | No            |
|             | Education deprivation: quartile 3                                        | LA    | Yes                 | No            |
|             | Education deprivation: quartile 4 (most deprived)                        | LA    | Yes                 | No            |
|             | Income deprivation: quartile 2                                           | LA    | Yes                 | No            |
|             | Income deprivation: quartile 3                                           | LA    | Yes                 | No            |
|             | Income deprivation: quartile 4 (most deprived)                           | LA    | Yes                 | No            |
|             | People with income support                                               | LA    | Yes                 | Yes           |
|             | People with pension credit                                               | LA    | Yes                 | Yes           |
| Carer needs | Female carers                                                            | LA    | Yes                 | Yes           |
|             | Carers aged 65 or older                                                  | LA    | Yes                 | Yes           |
|             | Carers of non-white ethnicity                                            | LA    | Yes                 | Yes           |
|             | Carers who did not state ethnicity                                       | LA    | Yes                 | Yes           |
|             | Carers with Physical impairment                                          | LA    | Yes                 | Yes           |
|             | Carers with sight or hearing loss                                        | LA    | Yes                 | Yes           |
|             | Carers with long-standing illness                                        | LA    | Yes                 | Yes           |
|             | Carers who is retired                                                    | LA    | Yes                 | Yes           |
|             | Carers who is employed                                                   | LA    | Yes                 | Yes           |
|             | Carers who is self-employed                                              | LA    | Yes                 | Yes           |

| Control variable                                                       | Level | Longo et al. (2021) | New model (2) |
|------------------------------------------------------------------------|-------|---------------------|---------------|
| Carers who is unemployed                                               | LA    | Yes                 | Yes           |
| Carers who is not in paid work because of caring role                  | LA    | Yes                 | No            |
| Carers who is in paid work but do not feel supported by their employer | LA    | Yes                 | No            |
| Carers who is self-employed but unable to balance work and caring role | LA    | Yes                 | No            |
| Carers with financial difficulties because of caring role              | LA    | Yes                 | No            |
| Carers who do not live with care recipient                             | LA    | Yes                 | Yes           |
| Carers in caring role between 6 months and 1 year                      | LA    | Yes                 | No            |
| Carers in caring role for more than 1 year                             | LA    | Yes                 | No            |
| Carers who provide personal care                                       | LA    | Yes                 | No            |
| Carers who provide physical help                                       | LA    | Yes                 | No            |
| Carers who provide other practical help                                | LA    | Yes                 | No            |
| Carers who provide help with medicines                                 | LA    | Yes                 | No            |
| Carers who provide emotional support                                   | LA    | Yes                 | No            |
| Total number of control variables                                      |       | 84                  | 47            |

Longo et al. (2021)= regression (1) as proposed by Longo et al. (2021), New model (2)=regression (2) in this study,  
LA=variable measured at the local authority-level; Ind=variable measured at the individual level, Yes=included, No=not included.



Table C2 – Full second-stage results in all financial years.

| Variable                                                                 |     | 2017/18             |                                   |                       | 2018/19             |                                   |                      | 2019/20             |                                   |                       |
|--------------------------------------------------------------------------|-----|---------------------|-----------------------------------|-----------------------|---------------------|-----------------------------------|----------------------|---------------------|-----------------------------------|-----------------------|
|                                                                          |     | Longo et al. (2021) | New model (2) with all covariates | New model (2)         | Longo et al. (2021) | New model (2) with all covariates | New model (2)        | Longo et al. (2021) | New model (2) with all covariates | New model (2)         |
| Public adult social care expenditure per user                            | LA  | 0.003***<br>(0.001) | 0.008**<br>(0.008)                | 0.006***<br>(0.002)   | 0.002**<br>(0.001)  | 0.011***<br>(0.003)               | 0.006***<br>(0.002)  | 0.002**<br>(0.001)  | 0.008**<br>(0.003)                | 0.009***<br>(0.003)   |
| Public adult social care expenditure per user squared                    | LA  |                     | -0.0002<br>(0.0001)               | -0.0004**<br>(0.0002) |                     | -0.0004*<br>(0.0003)              | -0.0003*<br>(0.0002) |                     | -0.0003<br>(0.0002)               | -0.0004**<br>(0.0002) |
| County                                                                   | LA  | 0.017               |                                   |                       | 0.007               |                                   |                      | 0.009               |                                   |                       |
| Metropolitan district                                                    | LA  | 0.016               |                                   |                       | -0.003              |                                   |                      | 0.003               |                                   |                       |
| Unitary authority                                                        | LA  | 0.0234*             |                                   |                       | 0.016               |                                   |                      | 0.016               |                                   |                       |
| Proportion of eligible users                                             | LA  |                     | 0.055                             | 0.0518***             |                     | 0.1056***                         | 0.0525***            |                     | 0.0694*                           | 0.0806***             |
| Female user                                                              | Ind | -0.0083***          | -0.0081***                        | -0.0082***            | -0.0083***          | -0.0083***                        | -0.0082***           | -0.0051**           | -0.0051**                         | -0.0052**             |
| User aged 65 or older                                                    | Ind | 0.0371***           | 0.0368***                         | 0.0370***             | 0.0368***           | 0.0366***                         | 0.0366***            | 0.0277***           | 0.0275***                         | 0.0274***             |
| User of non-white ethnicity                                              | Ind | -0.0308***          | -0.0307***                        | -0.0317***            | -0.0343***          | -0.0339***                        | -0.0354***           | -0.0240***          | -0.0237***                        | -0.0239***            |
| User who did not state ethnicity                                         | Ind | -0.0240**           | -0.0234**                         | -0.0220**             | -0.0230***          | -0.0215***                        | -0.0217***           | -0.0152**           | -0.0133*                          | -0.0155**             |
| User whose questionnaire was in non-English European languages           | Ind | -0.092              | -0.090                            | -0.089                | 0.0922***           | 0.0926***                         | 0.0903***            | 0.005               | 0.006                             | 0.008                 |
| User whose questionnaire was in South Asian languages                    | Ind | -0.0732***          | -0.0755***                        | -0.0626**             | -0.014              | -0.028                            | -0.032               | -0.0356*            | -0.029                            | -0.0458**             |
| User whose questionnaire was in Middle Eastern languages                 | Ind | -0.1199**           | -0.1236**                         | -0.1210**             | -0.1694**           | -0.1647**                         | -0.1710**            | -0.1934***          | -0.1955***                        | -0.1822***            |
| User who received sensory support                                        | Ind | 0.013               | 0.013                             | 0.013                 | -0.008              | -0.009                            | -0.008               | -0.004              | -0.004                            | -0.006                |
| User who received support with memory and cognition                      | Ind | 0.0265***           | 0.0261***                         | 0.0264***             | 0.0255***           | 0.0254***                         | 0.0261***            | 0.0292***           | 0.0300***                         | 0.0313***             |
| User who received learning disability support                            | Ind | 0.1257***           | 0.1242***                         | 0.1256***             | 0.1031***           | 0.1001***                         | 0.1092***            | 0.0959***           | 0.0946***                         | 0.0984***             |
| User who received mental health support                                  | Ind | 0.0139**            | 0.0145***                         | 0.0141**              | 0.0187***           | 0.0194***                         | 0.0190***            | 0.0198***           | 0.0202***                         | 0.0191***             |
| User who received social support                                         | Ind | -0.003              | -0.004                            | -0.004                | 0.014               | 0.013                             | 0.012                | 0.002               | 0.001                             | -0.002                |
| User who did not receive help with questionnaire                         | Ind | 0.0159***           | 0.0158***                         | 0.0162***             | 0.0092**            | 0.0092**                          | 0.0088**             | 0.0147***           | 0.0146***                         | 0.0151***             |
| User whose questionnaire was read by someone else                        | Ind | 0.0312***           | 0.0313***                         | 0.0314***             | 0.0352***           | 0.0354***                         | 0.0354***            | 0.0374***           | 0.0375***                         | 0.0381***             |
| User whose questionnaire was translated by someone else                  | Ind | 0.0081***           | 0.0081***                         | 0.0082***             | -0.001              | -0.001                            | 0.000                | -0.001              | -0.001                            | -0.001                |
| User whose questionnaire was only filled in by someone else              | Ind | -0.0153***          | -0.0152***                        | -0.0151***            | -0.0161***          | -0.0159***                        | -0.0164***           | -0.0151***          | -0.0150***                        | -0.0147***            |
| User whose questionnaire was talked through with someone else            | Ind | -0.0195***          | -0.0195***                        | -0.0194***            | -0.0200***          | -0.0199***                        | -0.0203***           | -0.0159***          | -0.0158***                        | -0.0156***            |
| User whose questionnaire was answered without asking by someone else     | Ind | -0.0645***          | -0.0644***                        | -0.0644***            | -0.0615***          | -0.0612***                        | -0.0613***           | -0.0520***          | -0.0519***                        | -0.0516***            |
| User who received an easy-read questionnaire                             | Ind | 0.017               | 0.018                             | 0.016                 | 0.0403***           | 0.0436***                         | 0.0331***            | 0.0447***           | 0.0458***                         | 0.0415**              |
| Users who cannot manage personal hygiene by themselves in past year      | LA  | 0.0001              | 0.001                             |                       | 0.001               | 0.001                             |                      | 0.0003              | 0.0002                            |                       |
| Users who cannot manage continence by themselves in past year            | LA  | -0.0002             | 0.0002                            |                       | 0.001               | 0.001                             |                      | -0.00002            | 0.00004                           |                       |
| Users who cannot dress by themselves in past year                        | LA  | 0.0004              | -0.001                            |                       | -0.0003             | 0.001                             |                      | -0.002              | -0.0027*                          |                       |
| Users who cannot feed by themselves in past year                         | LA  | -0.002              | -0.001                            |                       | 0.0003              | 0.001                             |                      | 0.0001              | 0.001                             |                       |
| Users who cannot ambulate by themselves in past year                     | LA  | 0.0001              | 0.0004                            |                       | -0.001              | -0.003                            |                      | 0.001               | 0.0034*                           |                       |
| Users who cannot manage personal hygiene by themselves in past two years | LA  | -0.0004             | -0.001                            |                       | 0.001               | 0.002                             |                      | 0.001               | 0.001                             |                       |
| Users who cannot manage continence by themselves in past two years       | LA  | 0.0037**            | 0.0034**                          |                       | 0.0002              | -0.0002                           |                      | -0.001              | -0.002                            |                       |
| Users who cannot dress by themselves in past two years                   | LA  | 0.000               | 0.002                             |                       | -0.001              | -0.001                            |                      | -0.001              | 0.001                             |                       |
| Users who cannot feed by themselves in past two years                    | LA  | -0.0035**           | -0.0048***                        |                       | -0.0003             | 0.002                             |                      | -0.0026**           | -0.0025**                         |                       |
| Users who cannot ambulate by themselves in past two years                | LA  | -0.002              | -0.0032*                          |                       | 0.0004              | 0.001                             |                      | 0.002               | 0.001                             |                       |
| People who are sight impaired                                            | LA  | -0.017              | -0.003                            |                       | 0.003               | 0.010                             |                      | -0.0290*            | -0.009                            |                       |
| People who are hearing impaired 2010                                     | LA  | -0.003              | 0.001                             |                       | -0.0223**           | -0.0303**                         |                      | 0.012               | 0.009                             |                       |
| People who are sight and hearing impaired                                | LA  | 0.052               | 0.045                             |                       | 0.0938*             | 0.1014*                           |                      | -0.032              | -0.013                            |                       |
| People aged 65 or older with dementia                                    | LA  | 0.002               | 0.003                             |                       | -0.001              | 0.002                             |                      | 0.005               | 0.0094**                          |                       |
| People whose disability limits daily activities a little                 | LA  | -0.013              | -0.017                            |                       | -0.012              | -0.0205*                          |                      | 0.003               | -0.005                            |                       |
| People whose disability limits daily activities a lot                    | LA  | 0.0330***           | 0.0397***                         |                       | -0.002              | 0.009                             |                      | 0.004               | 0.014                             |                       |
| Disability deprivation 2015: quartile 2                                  | LA  | 0.002               | 0.002                             |                       | -0.003              | -0.003                            |                      |                     |                                   |                       |
| Disability deprivation 2015: quartile 3                                  | LA  | 0.005               | 0.014                             |                       | -0.003              | 0.013                             |                      |                     |                                   |                       |

| Variable                                                               |    | 2017/18             |                                   |               | 2018/19             |                                   |               | 2019/20             |                                   |               |
|------------------------------------------------------------------------|----|---------------------|-----------------------------------|---------------|---------------------|-----------------------------------|---------------|---------------------|-----------------------------------|---------------|
|                                                                        |    | Longo et al. (2021) | New model (2) with all covariates | New model (2) | Longo et al. (2021) | New model (2) with all covariates | New model (2) | Longo et al. (2021) | New model (2) with all covariates | New model (2) |
| Disability deprivation 2015: quartile 4 (most deprived)                | LA | -0.001              | 0.010                             |               | 0.006               | 0.020                             |               |                     |                                   |               |
| Disability deprivation 2019: quartile 2                                | LA |                     |                                   |               |                     |                                   |               | -0.002              | 0.006                             |               |
| Disability deprivation 2019: quartile 3                                | LA |                     |                                   |               |                     |                                   |               | -0.009              | -0.005                            |               |
| Disability deprivation 2019: quartile 4 (most deprived)                | LA |                     |                                   |               |                     |                                   |               | -0.014              | -0.010                            |               |
| People aged 18-64 entitled to Disability Living Allowance              | LA | -0.0195**           | -0.0178**                         | -0.0244***    | -0.0141*            | -0.0155*                          | -0.0183***    | -0.012              | -0.011                            | -0.0252*      |
| People aged 65 or older entitled to Disability Living Allowance        | LA | -0.0337*            | -0.0571**                         | 0.0114**      | 0.016               | -0.012                            | 0.005         | 0.001               | -0.038                            | -0.003        |
| People aged 65 or older entitled to Attendance Allowance               | LA | -0.003              | -0.0058*                          | -0.002        | -0.001              | -0.005                            | -0.001        | -0.002              | -0.0055*                          | -0.0001       |
| Single-person households aged 0-64                                     | LA | -0.002              | -0.0033*                          | -0.002        | -0.0004             | -0.003                            | -0.0021*      | -0.001              | -0.001                            | -0.0037***    |
| Single-person households aged 65 or older                              | LA | -0.002              | -0.005                            | 0.0002        | 0.0099**            | 0.0077*                           | 0.001         | 0.002               | -0.003                            | -0.001        |
| People in household with 0.5 to 1.0 persons per bedroom                | LA | -0.004              | -0.003                            |               | -0.003              | -0.001                            |               | -0.005              | -0.0073*                          |               |
| People in household with 1.0 to 1.5 persons per bedroom                | LA | 0.0004              | 0.001                             |               | -0.002              | -0.002                            |               | 0.002               | 0.001                             |               |
| People in household with over 1.5 persons per bedroom                  | LA | -0.0058*            | -0.0062*                          |               | -0.003              | -0.002                            |               | -0.0062**           | -0.0091**                         |               |
| People who are house owners                                            | LA | -0.001              | -0.0003                           | -0.001        | 0.001               | 0.0003                            | -0.0002       | -0.0003             | -0.001                            | 0.000         |
| Population density per 10,000 people                                   | LA | 0.023               | 0.035                             | 0.003         | 0.020               | 0.0608*                           | 0.033         | 0.034               | 0.0600*                           | 0.0648**      |
| People who are in routine occupation                                   | LA | -0.002              | -0.001                            | -0.001        | 0.002               | 0.003                             | 0.002         | 0.002               | 0.002                             | 0.0048***     |
| People who never worked and are long-term unemployed                   | LA | 0.0070**            | 0.0086**                          | 0.0053**      | 0.0066*             | 0.0083**                          | 0.0054**      | 0.0065*             | 0.0097**                          | 0.003         |
| Education deprivation 2015: quartile 2                                 | LA | 0.003               | 0.009                             |               | 0.008               | 0.008                             |               |                     |                                   |               |
| Education deprivation 2015: quartile 3                                 | LA | -0.004              | 0.011                             |               | 0.011               | 0.022                             |               |                     |                                   |               |
| Education deprivation 2015: quartile 4 (most deprived)                 | LA | -0.004              | 0.013                             |               | 0.010               | 0.013                             |               |                     |                                   |               |
| Education deprivation 2019: quartile 2                                 | LA |                     |                                   |               | -0.011              | -0.004                            |               | -0.0145**           | -0.006                            |               |
| Education deprivation 2019: quartile 3                                 | LA |                     |                                   |               | -0.016              | -0.014                            |               | -0.013              | 0.003                             |               |
| Education deprivation 2019: quartile 4 (most deprived)                 | LA |                     |                                   |               | -0.018              | 0.003                             |               | -0.021              | -0.003                            |               |
| Income deprivation 2015: quartile 2                                    | LA | -0.003              | -0.013                            |               | 0.0452**            | 0.0562**                          |               |                     |                                   |               |
| Income deprivation 2015: quartile 3                                    | LA | -0.001              | -0.011                            |               | 0.0446*             | 0.0743**                          |               |                     |                                   |               |
| Income deprivation 2015: quartile 4 (most deprived)                    | LA | -0.007              | -0.022                            |               | 0.038               | 0.048                             |               |                     |                                   |               |
| Income deprivation 2019: quartile 2                                    | LA |                     |                                   |               | -0.034              | -0.0486**                         |               | 0.002               | -0.008                            |               |
| Income deprivation 2019: quartile 3                                    | LA |                     |                                   |               | -0.034              | -0.0784**                         |               | 0.005               | -0.006                            |               |
| Income deprivation 2019: quartile 4 (most deprived)                    | LA |                     |                                   |               | -0.040              | -0.0755**                         |               | 0.001               | -0.028                            |               |
| People with income support                                             | LA | -0.007              | -0.014                            | -0.001        | -0.002              | -0.012                            | -0.005        | -0.0400**           | -0.0626***                        | -0.021        |
| People with pension credit                                             | LA | -0.0012             | -0.0013                           | -0.0005       | 0.0004              | -0.0011                           | -0.0020       | 0.0009              | -0.0001                           | -0.0007       |
| Female carers                                                          | LA | -0.0004             | -0.00002                          | -0.0002       | 0.0002              | -0.0004                           | -0.001        | 0.0003              | 0.0002                            | 0.0004        |
| Carers aged 65 or older                                                | LA | -0.0001             | 0.0004                            | -0.00003      | -0.0004             | 0.0002                            | 0.0001        | 0.0001              | -0.0003                           | 0.0001        |
| Carers of non-white ethnicity                                          | LA | 0.001               | 0.001                             | -0.0003       | -0.0001             | 0.0001                            | -0.0001       | -0.0001             | -0.0004                           | -0.0002       |
| Carers who did not state ethnicity                                     | LA | 0.0001              | 0.0003                            | 0.0001        | 0.0003*             | 0.0009***                         | 0.0001        | 0.0001              | 0.0003                            | 0.0003*       |
| Carers with Physical impairment                                        | LA | 0.001               | 0.0002                            | -0.0001       | -0.0001             | -0.001                            | 0.0001        | 0.001               | 0.0027*                           | 0.001         |
| Carers with sight or hearing loss                                      | LA | 0.00002             | -0.001                            | -0.0001       | -0.001              | -0.0022*                          | -0.001        | -0.001              | -0.001                            | 0.001         |
| Carers with long-standing illness                                      | LA | 0.0002              | 0.002                             | 0.001         | 0.001               | 0.0024**                          | 0.001         | 0.0004              | -0.00001                          | -0.0001       |
| Carers who is retired                                                  | LA | 0.0003              | -0.0001                           | 0.001         | 0.001               | 0.002                             | 0.001         | -0.0002             | -0.001                            | 0.000002      |
| Carers who is employed                                                 | LA | -0.00004            | -0.0001                           | 0.001         | 0.001               | 0.003                             | 0.0003        | 0.002               | 0.000                             | 0.001         |
| Carers who is self-employed                                            | LA | 0.002               | 0.001                             | 0.002         | 0.0040**            | 0.0048**                          | 0.002         | 0.003               | 0.003                             | 0.003         |
| Carers who is unemployed                                               | LA | -0.001              | -0.003                            | -0.0001       | 0.001               | 0.002                             | -0.001        | 0.0001              | -0.002                            | -0.001        |
| Carers who is not in paid work because of caring role                  | LA | 0.0004              | 0.001                             |               | -0.0004             | -0.001                            |               | -0.0001             | 0.0002                            |               |
| Carers who is in paid work but do not feel supported by their employer | LA | 0.001               | 0.003                             |               | -0.001              | 0.001                             |               | -0.002              | 0.001                             |               |
| Carers who is self-employed but unable to balance work and caring role | LA | -0.003              | -0.003                            |               | -0.002              | -0.001                            |               | -0.0070**           | -0.0109***                        |               |
| Carers with financial difficulties because of caring role              | LA | -0.001              | -0.001                            |               | -0.001              | -0.0010*                          |               | -0.001              | -0.0015**                         |               |
| Carers who do not live with care recipient                             | LA | -0.0002             | -0.0001                           | -0.0001       | -0.001              | -0.001                            | -0.0001       | -0.0001             | 0.0001                            | 0.0001        |

| Variable                                                                         |    | 2017/18             |                                   |               | 2018/19             |                                   |               | 2019/20             |                                   |               |
|----------------------------------------------------------------------------------|----|---------------------|-----------------------------------|---------------|---------------------|-----------------------------------|---------------|---------------------|-----------------------------------|---------------|
|                                                                                  |    | Longo et al. (2021) | New model (2) with all covariates | New model (2) | Longo et al. (2021) | New model (2) with all covariates | New model (2) | Longo et al. (2021) | New model (2) with all covariates | New model (2) |
| Carers in caring role between 6 months and 1 year                                | LA | -0.003              | -0.006                            |               | -0.002              | -0.0002                           |               | 0.006               | 0.0176**                          |               |
| Carers in caring role for more than 1 year                                       | LA | -0.004              | -0.006                            |               | -0.002              | -0.0027**                         |               | 0.007               | 0.0140**                          |               |
| Carers who provide personal care                                                 | LA | 0.0003              | -0.0002                           |               | -0.0003             | -0.0003                           |               | 0.001               | 0.001                             |               |
| Carers who provide physical help                                                 | LA | 0.0004              | 0.0002                            |               | 0.001               | 0.0004                            |               | -0.001              | -0.001                            |               |
| Carers who provide other practical help                                          | LA | -0.001              | -0.00003                          |               | -0.0004             | 0.0004                            |               | 0.00001             | -0.00001                          |               |
| Carers who provide help with medicines                                           | LA | 0.0002              | 0.001                             |               | 0.0002              | 0.0004                            |               | 0.0004              | 0.0019*                           |               |
| Carers who provide emotional support                                             | LA | -0.0001             | -0.001                            |               | -0.0016*            | -0.0030**                         |               | -0.0002             | -0.001                            |               |
| Constant                                                                         |    | 1.5166***           | 1.5850***                         | 0.6875***     | 1.0470***           | 0.9109**                          | 0.7168***     | 0.201               | -0.269                            | 0.5752***     |
| Observations                                                                     |    | 52,602              | 52,602                            | 52,602        | 55,570              | 55,570                            | 55,570        | 50,441              | 50,441                            | 50,441        |
| Variance inflation factor on ASC expenditure per user                            |    | 5.3                 | 93.2                              | 18.4          | 5.5                 | 104.0                             | 22.2          | 9.1                 | 73.1                              | 26.4          |
| Variance inflation factor on ASC expenditure per user squared                    |    | -                   | 10.9                              | 3.2           | -                   | 16.5                              | 4.7           | -                   | 9.6                               | 3.2           |
| F-test of expenditure and its square's p-value                                   |    | -                   | 0.053                             | 0.007         | -                   | 0.007                             | 0.004         | -                   | 0.069                             | 0.002         |
| First-stage Kleibergen-Paap rk Wald F statistic                                  |    | 434.3               | 9.1                               | 15.8          | 398.6               | 6.7                               | 10.9          | 408.9               | 7.9                               | 7.4           |
| First-stage Sanderson-Windmeijer F statistic on ASC expenditure per user         |    | 434.3               | 16.3                              | 26.4          | 398.6               | 11.4                              | 18.8          | 408.9               | 13.7                              | 13.6          |
| First-stage Sanderson-Windmeijer F statistic on ASC expenditure per user squared |    | -                   | 35.2                              | 31.7          | -                   | 13.2                              | 22.7          | -                   | 17.7                              | 11.1          |
| First-stage Sanderson-Windmeijer F statistic on proportion of eligible users     |    | -                   | 19.9                              | 27.1          | -                   | 11.9                              | 18.6          | -                   | 15.4                              | 13.1          |
| Over-identification test                                                         |    | 0.595               | 0.521                             | 0.580         | 0.715               | 0.863                             | 0.871         | 0.777               | 0.705                             | 0.334         |

Longo et al. (2021)= regression (1) as proposed by Longo et al. (2021), New model (2) with all covariates=regression (2) in this study including all the control variables used by Longo et al. (2021), New model (2)=regression (2) in this study, LA=local-authority level variable, Ind=individual-level variable.

The dependent variable is the user care-related quality of life measured at the individual level. In the new model (2), we subtract the mean from public adult social care expenditure per user to interpret its estimated coefficient as the marginal effect at mean expenditure rather than at zero. The Instrumental variable in the model by Longo et al. (2021) is the council tax base per user. The instruments in the new model (2) proposed in this study are the council tax base per user, its square, and the local authority-type dummies. In the model by Longo et al. (2021), the over-identification test is run by using the business rates tax base per user and the Area Cost Adjustment index as additional instruments. All regressions are weighted using the survey weight. Standard errors are clustered within LAs and strata, and they are reported in parenthesis.

\*\*\* = p-value<0.01, \*\* = p-value<0.05, \* = p-value<0.10

## Appendix D

### D1. Sensitivity analysis using 2015/16 and 2016/17 data

As a sensitivity analysis, we estimate regression (2) using data from the financial years 2015/16 and 2016/17. Data from these two financial years are used in a sensitivity analysis because they do not include the survey weight and the stratum variable. These two variables are key for making inference with survey data. Therefore, using the available variables included in these datasets, we construct the survey weight and stratum variable by making some assumptions. However, variables constructed on assumptions are prone to measurement error. Therefore, we use estimates from these data to obtain a qualitative indication about the robustness of the results in the main analysis. Table D1 and Table D2 report the key results of this sensitivity analysis. The estimated parameters of key interest on ASC expenditure per user and its square, as well as the marginal effects at multiple values of ASC expenditure per user are similar to the results for 2017/18, 2018/19 and 2019/20.

Table D1 – Key second-stage results for 2015/16 and 2016/17.

| Variable                                              | New model (2)        |                     |
|-------------------------------------------------------|----------------------|---------------------|
|                                                       | 2015/16              | 2016/17             |
| Public adult social care expenditure per user         | 0.008***<br>(0.003)  | 0.007***<br>(0.002) |
| Public adult social care expenditure per user squared | -0.0004*<br>(0.0002) | -0.0003<br>(0.0002) |
| Observations                                          | 59,891               | 60,441              |
| F-test of expenditure and its square's p-value        | 0.007                | 0.006               |
| First stage Kleibergen-Paap rk Wald F statistic       | 10.9                 | 14.6                |
| Over-identification test's p-value                    | 0.319                | 0.223               |

New model (2)=regression (2) in this study.

The dependent variable is the user care-related quality of life measured at the individual level. In the new model, we subtract the mean from public adult social care expenditure per user to interpret its estimated coefficient as the marginal effect at mean expenditure rather than at zero. The Instrumental variables are the council tax base per user, its square, and the local authority type dummies. Results on control variables are not reported. All regressions are weighted using the survey weight. Standard errors are clustered within LAs and strata, and they are reported in parenthesis.

\*\*\* = p-value<0.01, \*\* = p-value<0.05, \* = p-value<0.10

Table D2 – Marginal effects at multiple values of ASC expenditure per user for 2015/16 and 2016/17.

| Public adult social care expenditure per user | 2015/16 |                 | 2016/17 |                 |
|-----------------------------------------------|---------|-----------------|---------|-----------------|
|                                               | Value   | Marginal effect | Value   | Marginal effect |
| No expenditure                                | 0.0     | 0.025**         | 0.0     | 0.023**         |
| At the min value                              | 14.2    | 0.015***        | 16.5    | 0.014**         |
| At the mean                                   | 23.2    | 0.008***        | 26.6    | 0.007***        |
| At the max value                              | 45.1    | -0.008          | 47.3    | -0.003          |

\*\*\* = p-value<0.01, \*\* = p-value<0.05, \* = p-value<0.10

**References**

1. Longo F, Claxton K, Lomas J, et al. Does public long-term care expenditure improve care-related quality of life of service users in England? *Health Economics* 2021;30(10):2561-81.
2. Wooldridge JM. Introductory econometrics: A modern approach: Cengage learning 2015.
